# Supplementary material for: Long-range transport of anthropogenic air pollutants into the marine air: Insight into fine particle transport and chloride depletion on sea salts
Source: Copernicus journal article supplement (doi:10.5194/acp-2021-623), 2021-07-29
Supplement: Supplementary file 1 [file acp-2021-623-supplement-version3.pdf]

1  
2  
3  
4  
5  
6  
7  
8  
9  
10  
11  
12  
13  
14  
15

Supporting Information for

**Long-range transport of anthropogenic air pollutants into the  
marine air: Insight into fine particle transport and chloride depletion  
on sea salts**

Liang Xu<sup>1</sup>, Xiaohuan Liu<sup>2</sup>, Huiwang Gao<sup>2</sup>, Xiaohong Yao<sup>2</sup>, Daizhou Zhang<sup>3</sup>, Lei Bi<sup>1</sup>, Lei Liu<sup>1</sup>,

Jian Zhang<sup>1</sup>, Yinxiao Zhang<sup>1</sup>, Yuanyuan Wang<sup>1</sup>, Qi Yuan<sup>2</sup>, Weijun Li<sup>1,\*</sup>

<sup>1</sup>Department of Atmospheric Sciences, School of Earth Sciences, Zhejiang University, Hangzhou  
310027, China

<sup>2</sup>Key Laboratory of Marine Environment and Ecology, Ministry of Education, Ocean University of  
China, Qingdao 266100, China

<sup>3</sup>Faculty of Environmental and Symbiotic Sciences, Prefectural University of Kumamoto,  
Kumamoto 862-8502, Japan

\*Corresponding author: W. Li (liweijun@zju.edu.cn)

16 Table 1. Detailed information about sampling dates, times, and meteorological  
 17 conditions for samples.

| <b>ID</b> | <b>Date</b> | <b>Time</b>  | <b>Duration</b> | <b>RH</b> | <b>Wind speed</b> |
|-----------|-------------|--------------|-----------------|-----------|-------------------|
|           |             | (BJT, UTC+8) | (Second)        | (%)       | (m/s)             |
| 1         | 3/18        | 19:40        | 120             | 73.80     | 4.4               |
| 2         | 3/19        | 09:21        | 120             | 77.80     | 5.0               |
| 3         | 3/19        | 14:20        | 180             | 85.30     | 5.8               |
| 4         | 3/21        | 18:36        | 180             | 53.20     | 7.4               |
| 5         | 3/22        | 16:20        | 180             | 46.10     | 1.8               |
| 6         | 3/23        | 15:48        | 180             | 50.30     | 7                 |
| 7         | 3/24        | 10:36        | 180             | 44.50     | 3.2               |
| 8         | 3/24        | 15:27        | 180             | 41.10     | 3.1               |
| 9         | 3/26        | 21:02        | 180             | 59.90     | 1.7               |
| 10        | 4/10        | 09:20        | 180             | 71.20     | 8.2               |
| 11        | 4/13        | 14:52        | 180             | 51.70     | 1.6               |
| 12        | 4/15        | 11:52        | 180             | 40.60     | 5.6               |
| 13        | 4/17        | 15:13        | 180             | 64.14     | 2.1               |
| 14        | 4/18        | 15:02        | 180             | 73.60     | 6.3               |
| 15        | 4/19        | 15:56        | 180             | 69.50     | 4.2               |
| 16        | 4/21        | 07:59        | 180             | 54.90     | 1.5               |
| 17        | 4/21        | 10:43        | 180             | 71.00     | 16.4              |
| 18        | 4/21        | 15:06        | 180             | 75.40     | 13.7              |

|    |      |       |     |       |      |
|----|------|-------|-----|-------|------|
| 19 | 4/21 | 17:47 | 180 | 74.50 | 2.9  |
| 20 | 4/22 | 09:25 | 180 | 74.80 | 2.3  |
| 21 | 4/22 | 12:35 | 180 | 78.30 | 12.3 |
| 22 | 4/22 | 12:44 | 180 | 78.30 | 12.3 |

18

19

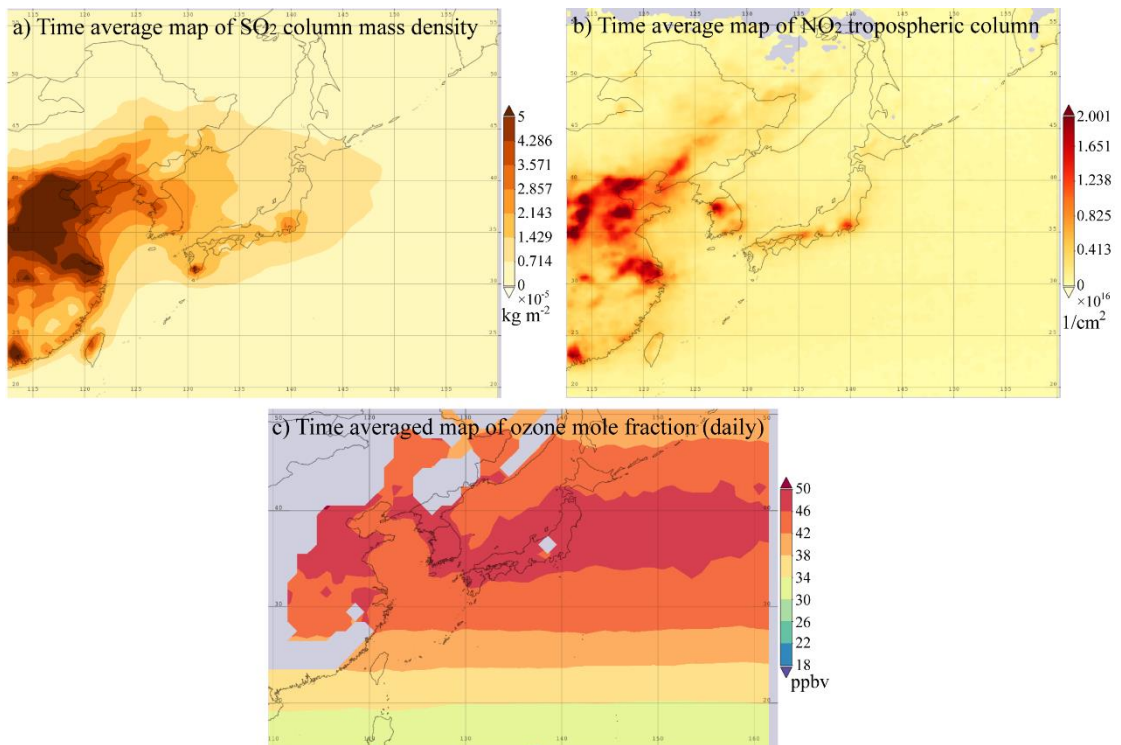

20

21 Figure S1. Time averaged map of SO<sub>2</sub> column mass density, NO<sub>2</sub> tropospheric column,  
 22 and O<sub>3</sub> mole fraction during our observation (17 March to 22 April 2014). The images  
 23 were downloaded from NASA Giovanni website  
 24 (<http://giovanni.gsfc.nasa.gov/giovanni>) (Acker and Leptoukh, 2007).

25

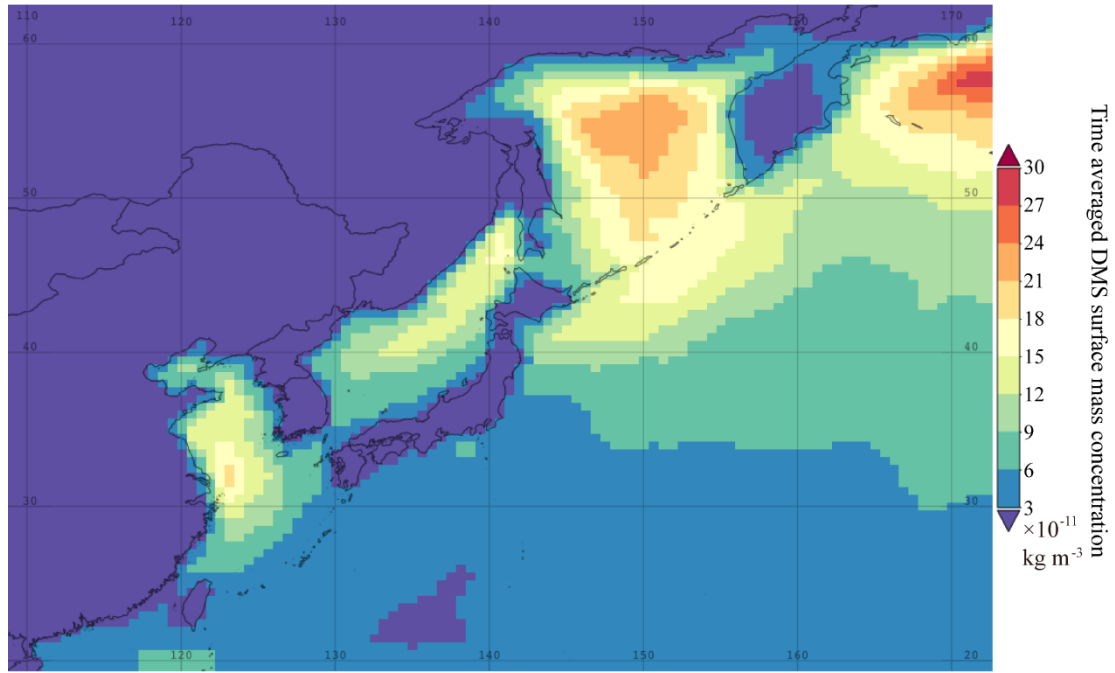

26

27 Figure S2. Time averaged map of dimethyl sulfide (DMS) surface mass concentration  
 28 over March to April 2014. The image was downloaded from NASA Giovanni website  
 29 (<http://giovanni.gsfc.nasa.gov/giovanni>) (Acker and Leptoukh, 2007).

30

31 **References**

32 Acker, J. G., and Leptoukh, G.: Online analysis enhances use of NASA Earth science data, Eos  
 33 Transactions, American Geophysical Union, 88, 14-17, <https://doi.org/10.1029/2007EO020003>,  
 34 2007.

35
